# Supplementary material for: Disentangling Atmospheric, Hydrological, and Coupling Uncertainties in Compound Flood Modeling within a Coupled Earth System Model
Source: Copernicus journal article supplement (doi:10.5194/egusphere-2024-2785), 2024-09-24
Supplement: Supplementary file 1 [file egusphere-2024-2785-supplement.pdf]

# Supplementary information for Disentangling Atmospheric, Hydrological, and Coupling Uncertainties in Compound Flood Modeling within a Coupled Earth System Model

Dongyu Feng<sup>1</sup>, Zeli Tan<sup>1</sup>, Darren Engwirda<sup>2</sup>, Jonathan D. Wolfe<sup>2</sup>, Donghui Xu<sup>1</sup>, Chang Liao<sup>1</sup>, Gautam Bisht<sup>1</sup>, James J. Benedict<sup>2</sup>, Tian Zhou<sup>1</sup>, Mithun Deb<sup>3</sup>, Hong-Yi Li<sup>4</sup>, and L. Ruby Leung<sup>1</sup>

<sup>1</sup>Atmospheric, Climate, & Earth Sciences Division, Pacific Northwest National Laboratory, Richland, WA, 99354, USA

<sup>2</sup>T-3 Fluid Dynamics and Solid Mechanics Group, Los Alamos National Laboratory, Los Alamos, NM, 87545, USA

<sup>3</sup>Marine and Coastal Research Laboratory, Pacific Northwest National Laboratory, Sequim, WA, 98382, USA

<sup>4</sup>Department of Civil and Environmental Engineering, University of Houston, TX, 77204, USA

10 *Correspondence to:* Dongyu Feng (dongyu.feng@pnnl.gov)

## Content of this file

Figure S1~S9

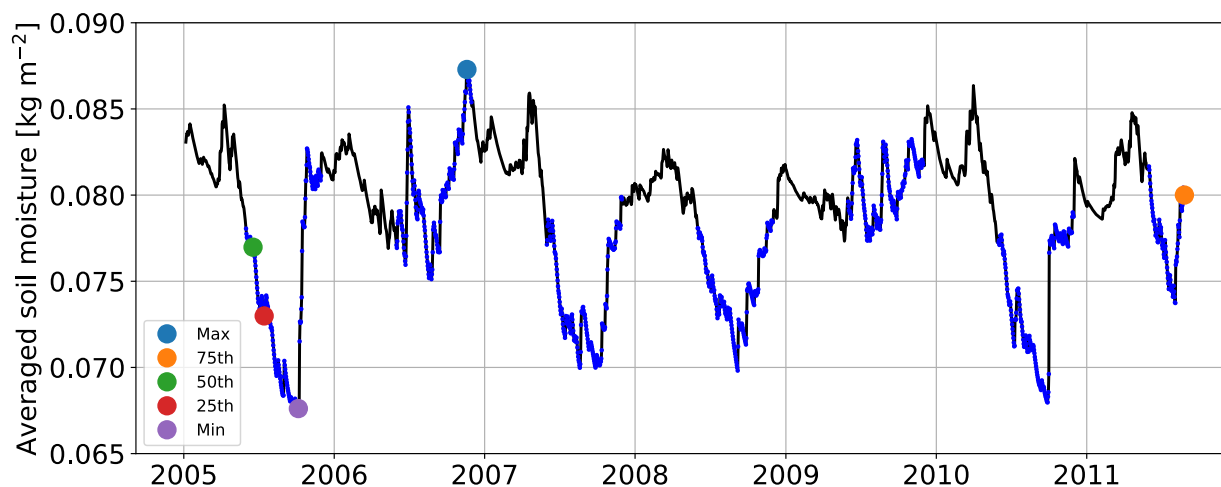

15 **Figure S1:** Time series of soil moisture averaged in Delaware River Basin (DRB). The hurricane seasons are highlighted by blue. The colored circles represent the selected quantiles used to generate the enhanced simulation ensemble.

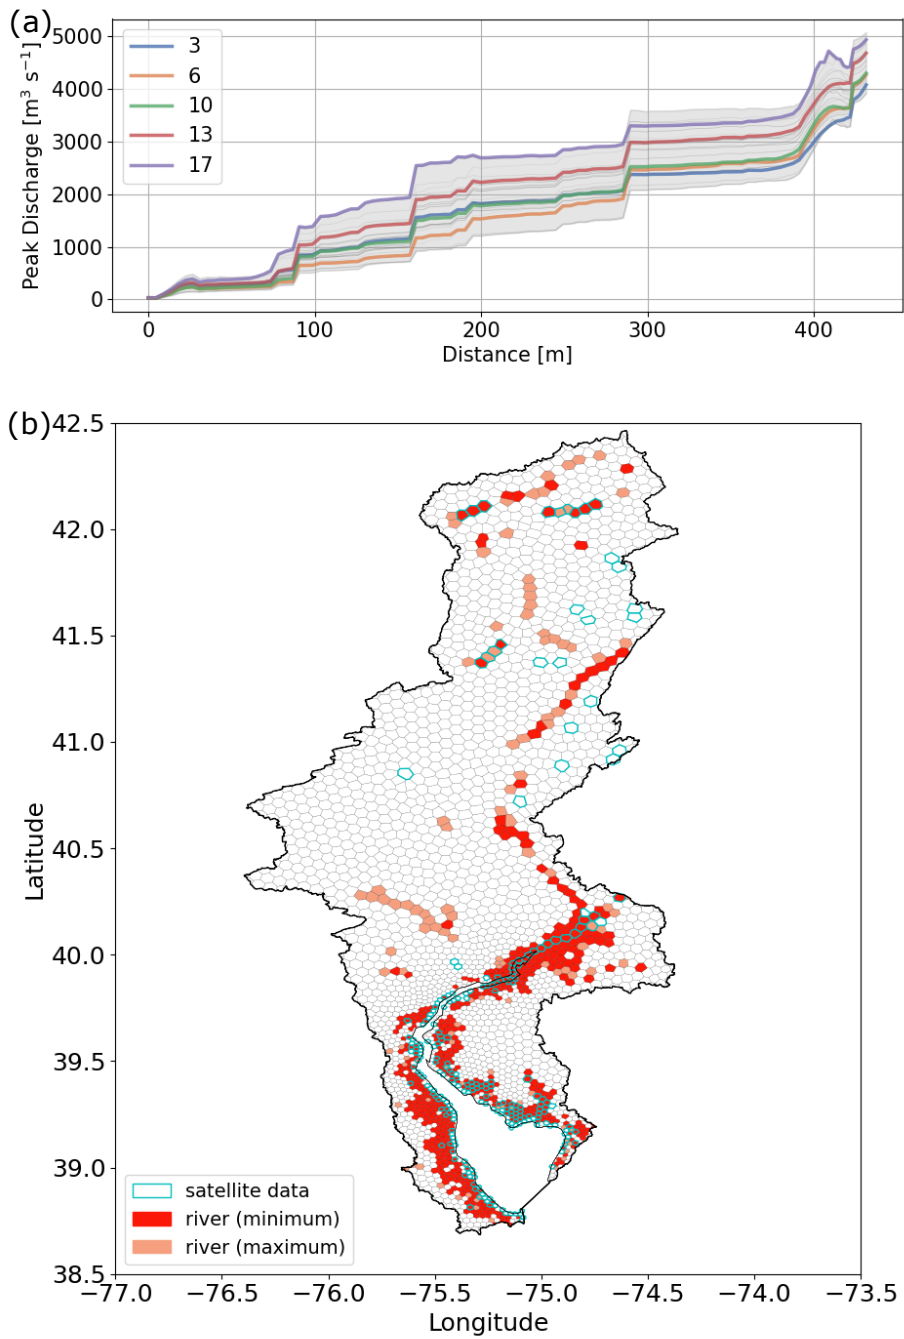

20 **Figure S2: (a) Peak discharge along the Delaware River mainstem modeled using the five selected atmospheric ensemble members. (b) The corresponding riverine inundation extent. Darker and lighter red colors indicate the minimum and maximum inundation extent, respectively, among the five ensemble.**

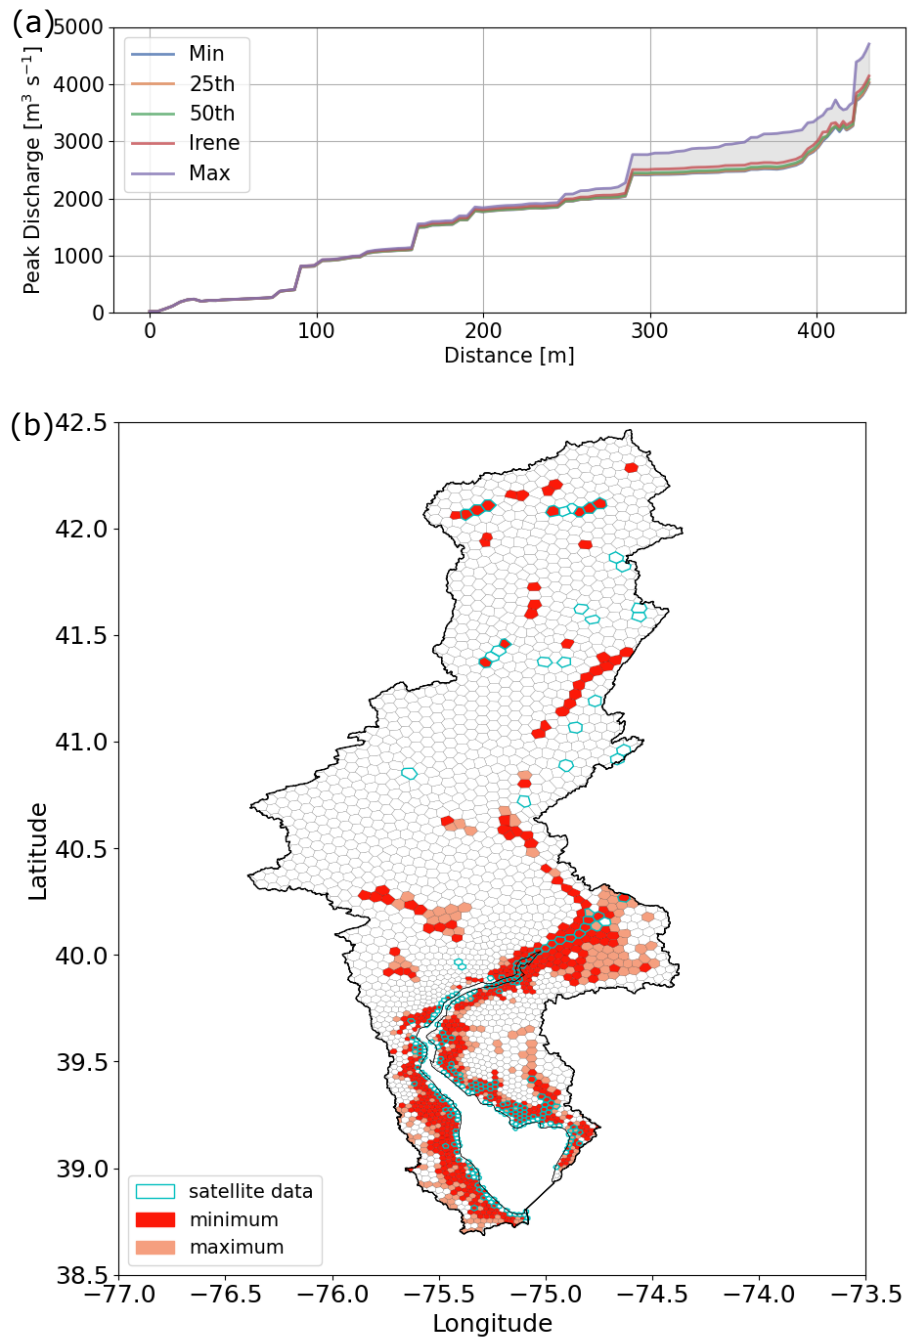

Figure S3: (a) Peak discharge along the Delaware River mainstem modeled from the simulations with five AMCs selected in Figure S1. (b) The corresponding riverine inundation extent.

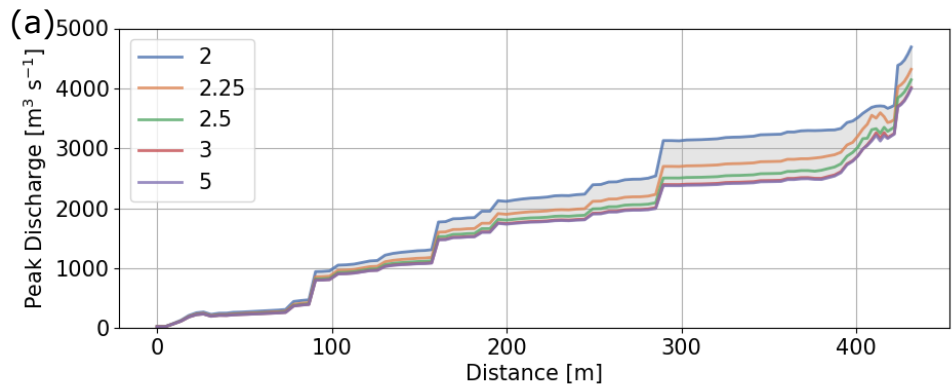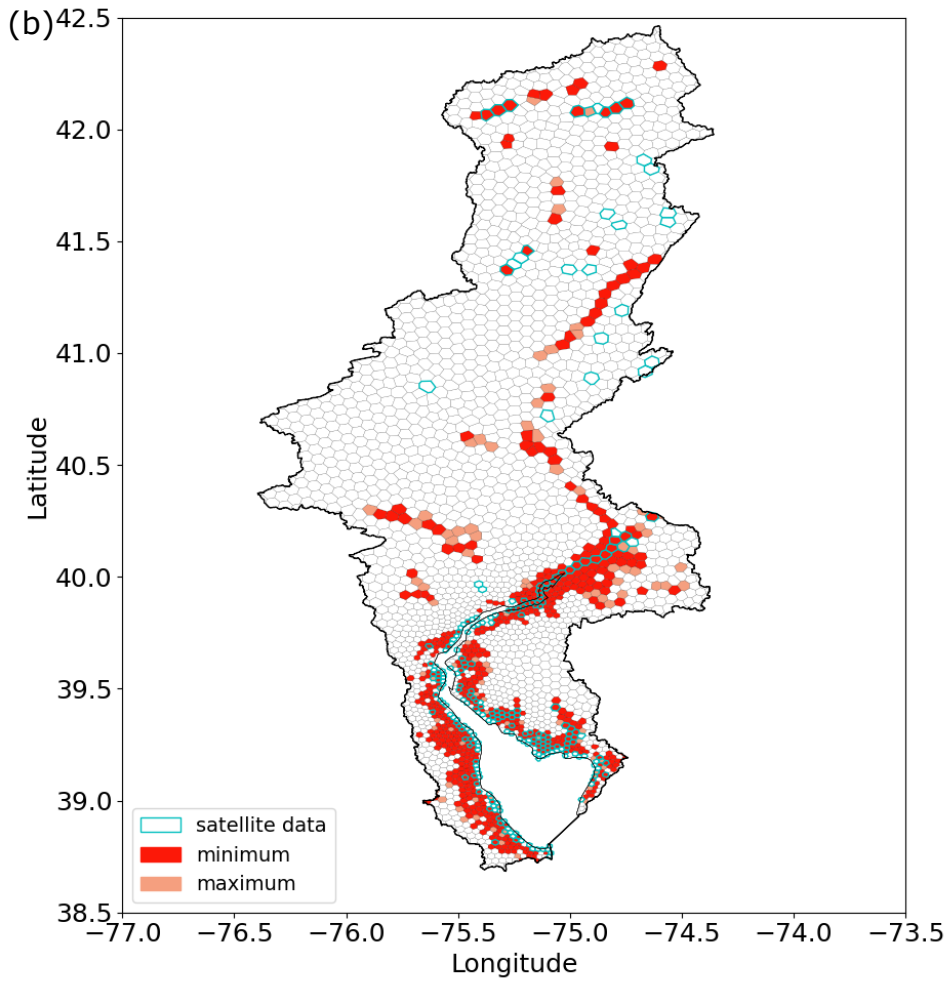

25

**Figure S4: (a) Peak discharge along the Delaware River mainstem modeled from the simulations using five values of  $f_{\text{drain}}$  (i.e., 2, 2.25, 2.5, 3 and 5). (b) The corresponding riverine inundation extent.**

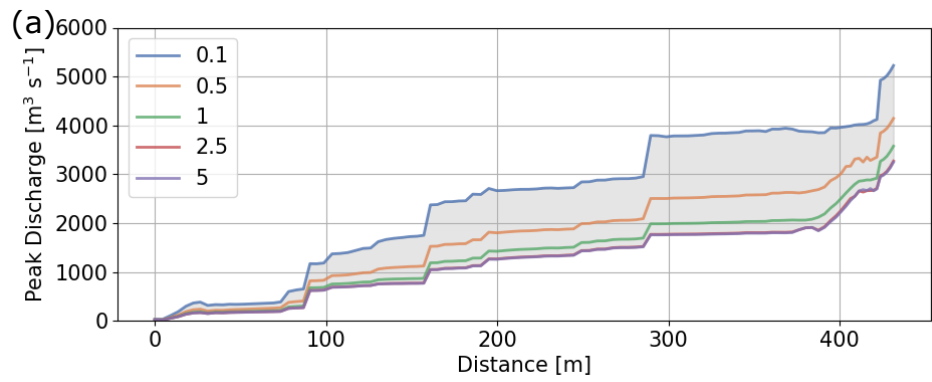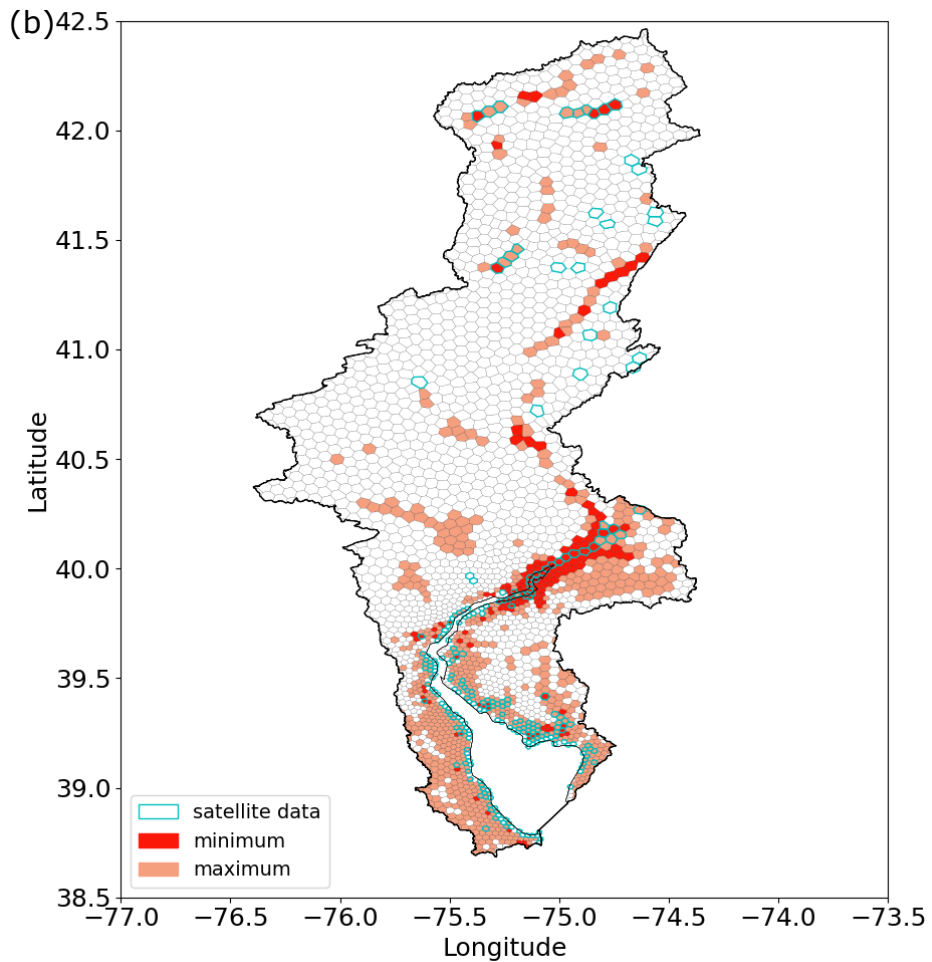

30 **Figure S5: (a) Peak discharge along the Delaware River mainstem modeled from the simulations using five values of  $f_{over}$  (i.e., 0.1, 0.5, 1, 2.5 and 5). (b) The corresponding riverine inundation extent.**

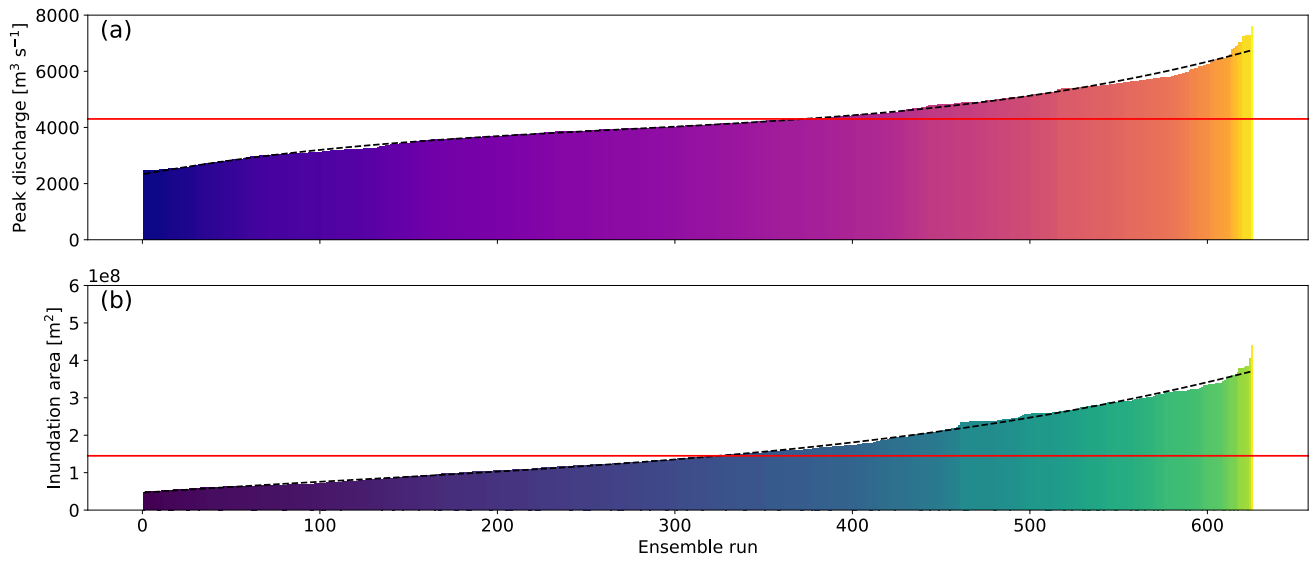

**Figure S6: (a) Peak discharge and (b) riverine inundation area of the 625 ensemble simulations. The red lines represent the results of the simulation that best describes Iren**

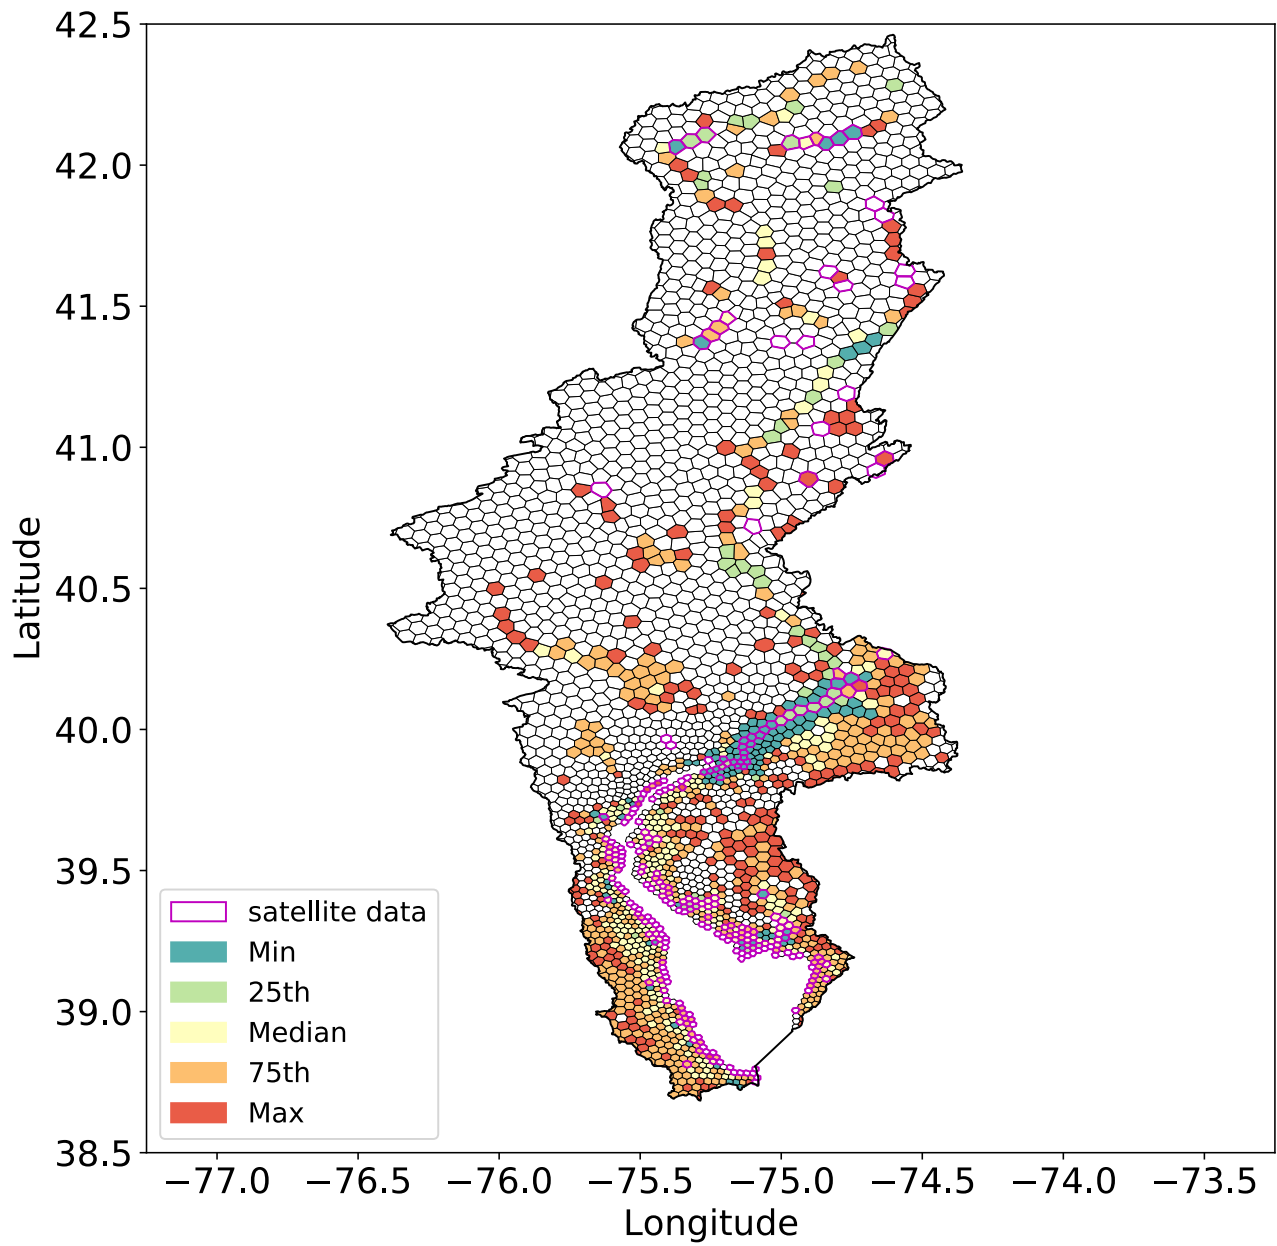

35 **Figure S7: The plausible outcomes of inundated extent in DRB with the three colors representing the minimum, Irene and maximum inundation from the 625 ensemble runs.**

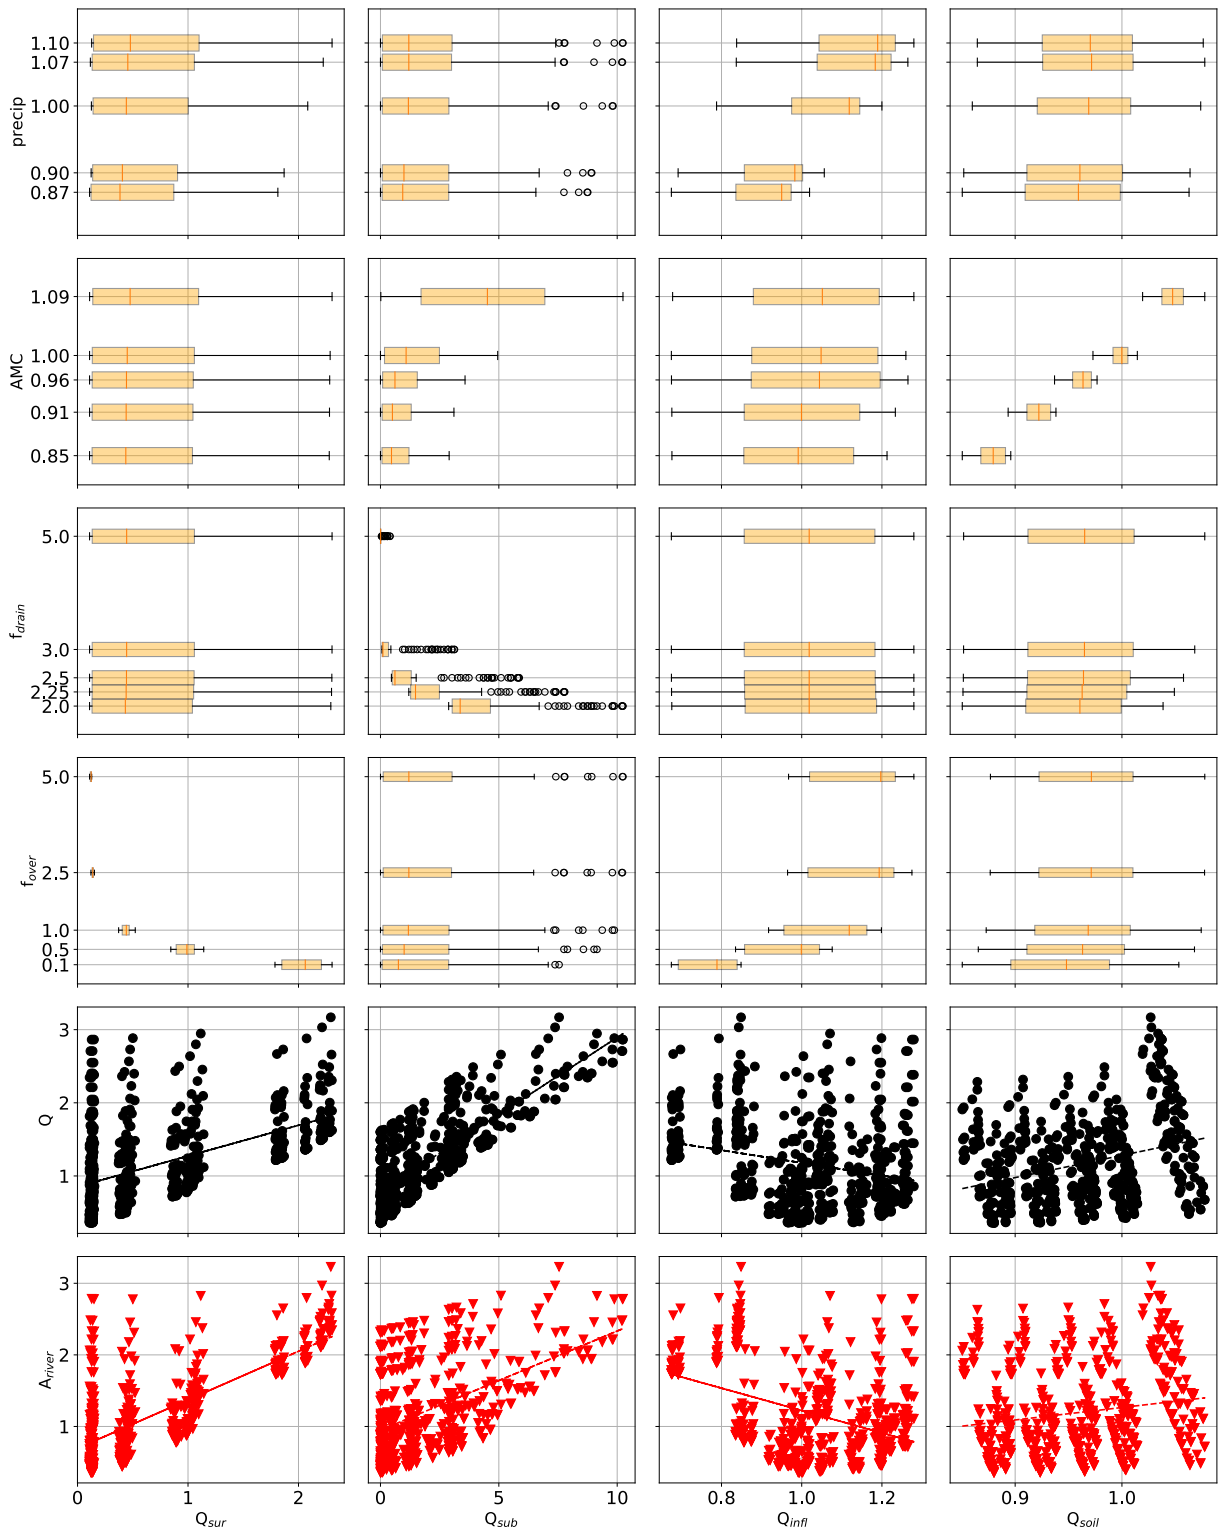



Figure S8: The top four rows are bar plots of the perturbation parameters (Y-axis) against the four hydrological drivers (X-axis). The bottom two rows are scatter plots of river discharge and riverine inundation area (Y-axis) against the hydrological drivers (X-axis). The data are from the 625 ensemble simulations. All variables except  $f_{drain}$  and  $f_{over}$  are normalized with respect to their maximum values.

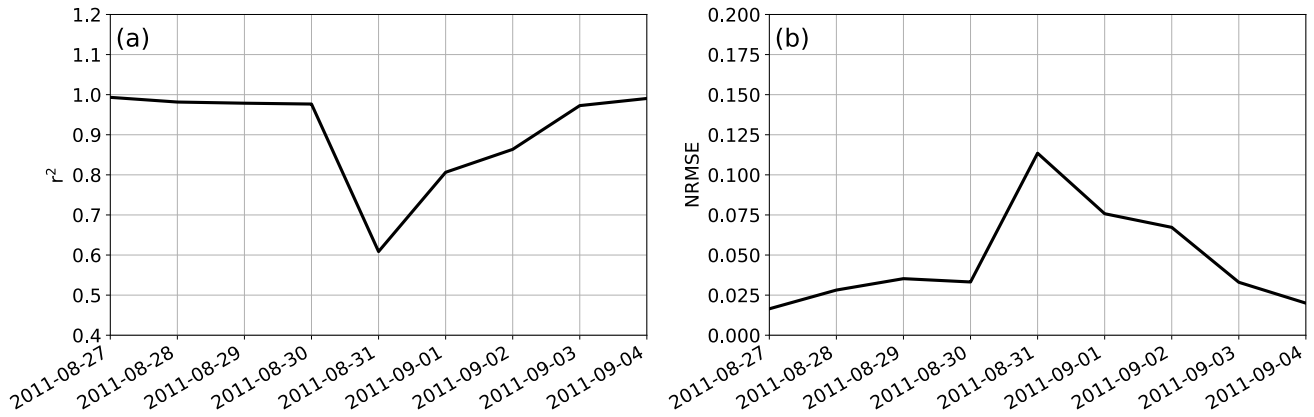

Figure S9: Time evolution of (a)  $r^2$  and (b) NRMSE, for the ANN trained from daily data in corresponding to Figure 10.
